# Supplementary material for: Photo-responsive liquid crystalline epoxy networks with exchangeable disulfide bonds
Source: Royal Society of Chemistry journal article supplement (doi:10.1039/c7ra06343a), 2017-01-01
Supplement: c7ra06343a1.pdf [file c7ra06343a1.pdf]

## Supporting Information

### **Photo-responsive Liquid Crystalline Epoxy Networks with Exchangeable Disulfide Bonds**

Yuzhan Li<sup>a</sup>, Yuehong Zhang<sup>a</sup>, Orlando Rios<sup>b</sup>, Jong K. Keum<sup>c</sup>, and Michael R. Kessler<sup>a,d,\*</sup>

<sup>a</sup> School of Mechanical and Materials Engineering, Washington State University, Pullman, WA 99164, USA

<sup>b</sup> Deposition Sciences Group, Oak Ridge National Laboratory, Oak Ridge, TN 37831, USA

<sup>c</sup> Center for Nanophase Materials Sciences, Oak Ridge National Laboratory, Oak Ridge, TN 37831, USA

<sup>d</sup> Department of Mechanical Engineering, North Dakota State University, Fargo, ND 58102, USA

\* PO Box 642920, Pullman, WA, 99164-2920; Phone (509) 335-8654; Email:  
[MichaelR.Kessler@wsu.edu](mailto:MichaelR.Kessler@wsu.edu)

#### **List of supplementary figures and videos**

Figure S1 Reaction mechanism of LCEN

Figure S2 Polarized optical microscopy images of fully cured LCEN at room temperature

Figure S3 LC formation and macroscopic orientation induced elongation of LCEN

Figure S4 Thermal and LC properties of reprocessed LCEN films

Figure S5 Cyclic thermomechanical tensile test of reprocessed LCEN films

Figure S6 Triple shape memory test of reprocessed LCEN films

Video S1 Blue light induced bending of LCEN (parallel condition)

Video S2 Blue light induced bending of LCEN (perpendicular condition)

Video S3 UV-induced shape recovery process of LCEN

### Monomer synthesis

The azobenzene-based epoxy monomer was synthesized as follows: a mixture of 4,4'-(1,2-diazenediyl)bisphenol (10.06 g), BTMAB (0.36 g) and epichlorohydrin (73.64 ml) was placed in a two-neck flask and refluxed for 60 min. NaOH (3.76 g) was dissolved in 21.3 ml of water to prepare 15% NaOH aqueous solution. The solution was added into the flask dropwise over a period of 4 hours under reflux. The reaction was carried out for an additional 12 hours at room temperature. The final product was washed with cold methanol and water. A yellow powder was obtained by recrystallization using isopropyl alcohol and chloroform (2:1). <sup>1</sup>H NMR (300 MHz, CDCl<sub>3</sub>): δ2.79 (2H, dd, CH<sub>2</sub> of epoxy), δ2.94 (2H, dd, CH<sub>2</sub> of epoxy), δ3.40 (2H, m, CH of epoxy), δ4.02 (2H, dd, CH<sub>2</sub> of glycidyl), δ4.33 (2H, dd, CH<sub>2</sub> of glycidyl), δ7.01 (4H, d, azobenzene), δ7.86(4H, d, azobenzene).

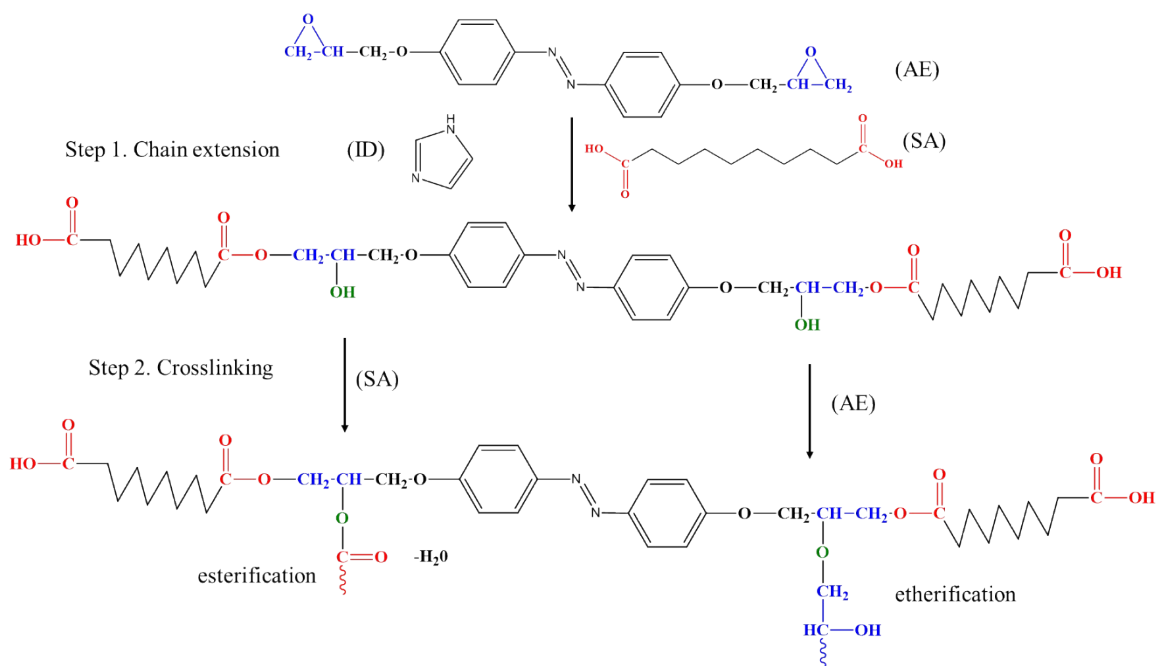

Figure S1. Reaction mechanism of LCEN.

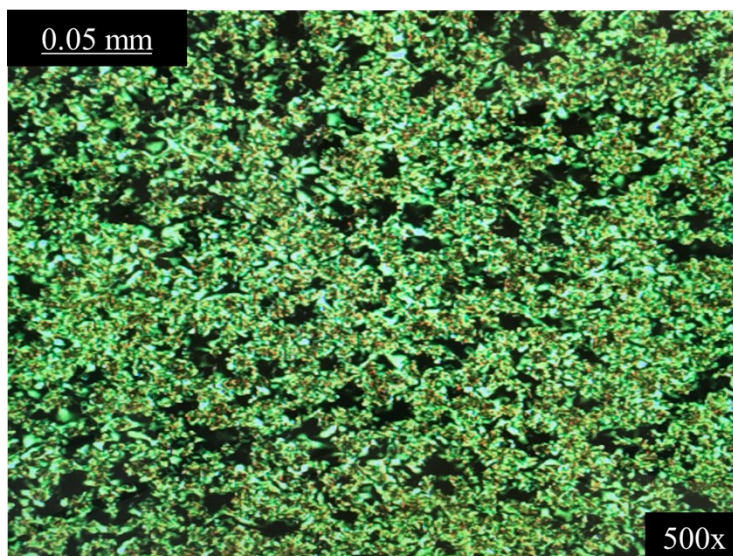

Figure S2. Polarized optical microscopy images of fully cured LCEN at room temperature.

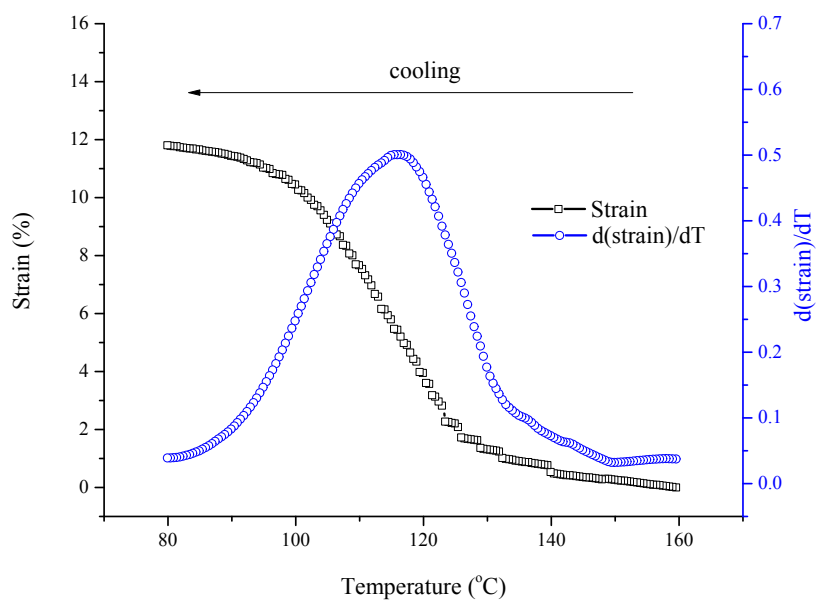

Figure S3. LC formation and macroscopic orientation induced elongation of LCEN during the cooling process in a cyclic thermomechanical tensile test.

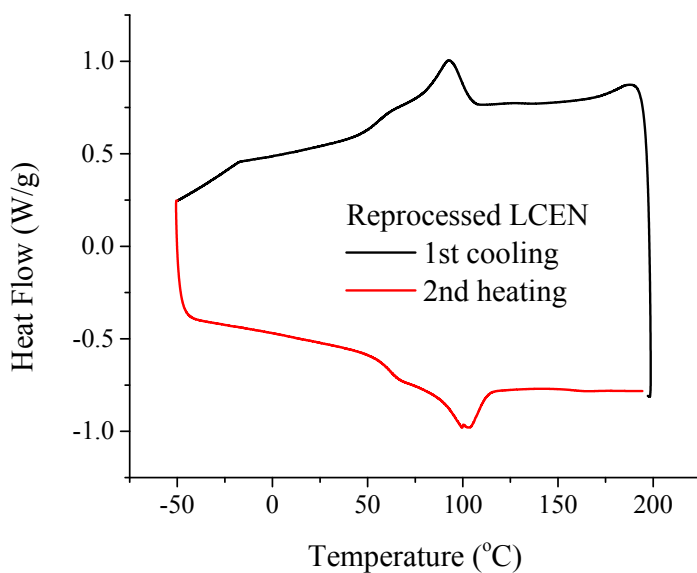

Figure S4. Thermal and LC properties of reprocessed LCEN films.

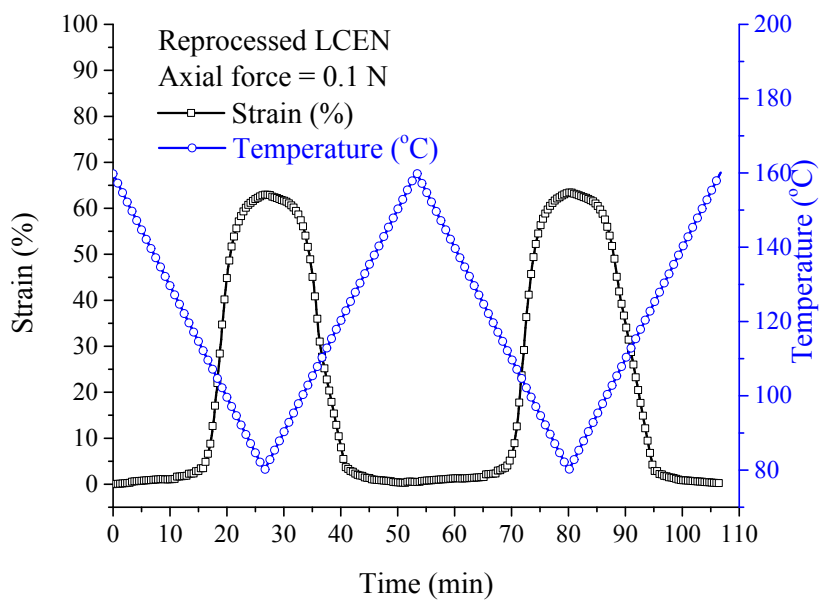

Figure S5. Cyclic thermomechanical tensile test of reprocessed LCEN films.

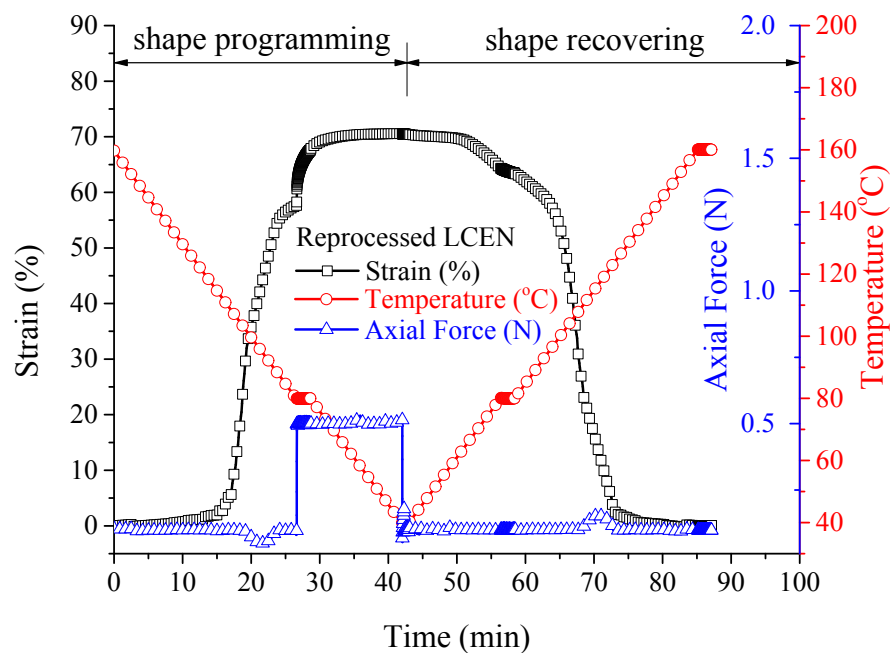

Figure S6. Triple shape memory test of reprocessed LCEN films.
